# Supplementary material for: Blockade of the checkpoint PD-1 by its ligand PD-L1 and the immuno-oncological drugs pembrolizumab and nivolumab
Source: Royal Society of Chemistry journal article supplement (doi:10.1039/d1cp03064g), 2021-01-01
Supplement: d1cp03064g1.pdf [file d1cp03064g1.pdf]

## ELECTRONIC SUPPLEMENTARY INFORMATION

### **Blockade of the checkpoint PD-1 by its ligand PD-L1 and the immuno-oncological drugs Pembrolizumab and Nivolumab**

Ana Beatriz M. L. A. Tavares

*Departamento de Biofísica e Farmacologia, Universidade Federal do Rio Grande do Norte, 59072-970, Natal-RN, Brazil,  
Hospital das Clínicas, Universidade Federal de Pernambuco, 50670-901, Recife, PE, Brazil*

J. X. Lima Neto, U. L. Fulco, and E. L. Albuquerque\*

*Departamento de Biofísica e Farmacologia  
Universidade Federal do Rio Grande do Norte, 59072-970, Natal-RN, Brazil*

---

\* Corresponding author, e-mail: eudenilson@gmail.com

TABLE I. Calculated total interaction energy (TIE), in kcal.mol<sup>-1</sup>, and the number of the pairs evaluated through the MFCC scheme for the amino-acids of PD-1 interacting with Pembrolizumab heavy-chain residues that showed the most significant interaction energies.

| Residue<br>PD-1 | TIE             |                 | Number<br>of<br>Pairs |
|-----------------|-----------------|-----------------|-----------------------|
|                 | $\epsilon_{20}$ | $\epsilon_{40}$ |                       |
| V64             | -4.30           | -4.25           | 7                     |
| N66             | -4.54           | -4.29           | 8                     |
| Y68             | -3.01           | -2.85           | 7                     |
| T76             | -5.21           | -5.13           | 8                     |
| D77             | -3.96           | -3.38           | 9                     |
| K78             | -29.80          | -29.06          | 13                    |
| D85             | -12.87          | -11.84          | 9                     |
| S87             | -6.54           | -6.12           | 19                    |
| Q88             | -5.45           | -5.43           | 21                    |
| P89             | -17.17          | -16.84          | 25                    |
| G90             | -10.98          | -10.61          | 12                    |
| Q91             | -3.26           | -3.13           | 10                    |
| I126            | -4.09           | -4.16           | 5                     |
| L128            | -3.32           | -3.33           | 6                     |
| K131            | -15.51          | -13.87          | 12                    |
| A132            | -3.90           | -3.60           | 4                     |
| I134            | -2.45           | -2.42           | 6                     |

TABLE II. Calculated total interaction energy (TIE), in kcal.mol<sup>-1</sup>, and the number of the pairs evaluated through the MFCC scheme for the amino-acids of Pembrolizumab heavy-chain (PEM-HC) interacting with PD-1 residues that showed the most significant interaction energies.

| Residue<br>PEM-HC | TIE             |                 | Number<br>of<br>Pairs |
|-------------------|-----------------|-----------------|-----------------------|
|                   | $\epsilon_{20}$ | $\epsilon_{40}$ |                       |
| Y33               | -21.94          | -21.48          | 15                    |
| Y35               | -5.47           | -5.36           | 8                     |
| I51               | -2.24           | -2.18           | 5                     |
| N52               | -8.34           | -8.27           | 10                    |
| S54               | -3.18           | -3.15           | 10                    |
| N55               | -2.25           | -2.06           | 12                    |
| T58               | -5.57           | -5.41           | 5                     |
| N59               | -5.99           | -5.74           | 6                     |
| R99               | -5.58           | -6.77           | 15                    |
| D100              | -2.77           | -2.19           | 14                    |
| Y101              | -18.49          | -18.07          | 23                    |
| R102              | -21.58          | -20.03          | 30                    |
| F103              | -13.91          | -13.62          | 21                    |
| D104              | -5.84           | -5.51           | 13                    |
| M105              | -9.67           | -9.02           | 13                    |
| D108              | -6.56           | -4.82           | 1                     |

TABLE III. Calculated total interaction energy (TIE), in kcal.mol<sup>-1</sup>, and the number of the pairs evaluated through the MFCC scheme for the amino-acids of PD-1 interacting with Pembrolizumab light-chain residues that showed the most significant interaction energies.

| Residue<br>PD-1 | TIE             |                 | Number<br>of<br>Pairs |
|-----------------|-----------------|-----------------|-----------------------|
|                 | $\epsilon_{20}$ | $\epsilon_{40}$ |                       |
| S62             | 9.75            | 9.75            | 8                     |
| F63             | 5.05            | 5.06            | 4                     |
| V64             | -2.77           | -2.79           | 7                     |
| F82             | -3.01           | -2.97           | 4                     |
| P83             | -5.75           | -5.87           | 9                     |
| E84             | -1.84           | -2.51           | 8                     |
| D85             | -2.05           | -1.98           | 8                     |
| R86             | -11.08          | -10.98          | 16                    |
| S87             | -10.01          | -9.82           | 12                    |
| L128            | -4.08           | -4.08           | 13                    |
| A129            | -4.59           | -4.59           | 8                     |
| K131            | -17.89          | -15.77          | 13                    |

TABLE IV. Calculated total interaction energy (TIE), in kcal.mol<sup>-1</sup>, and the number of the pairs evaluated through the MFCC scheme for the amino-acids of Pembrolizumab light-chain (PEM-LC) interacting with PD-1 residues that showed the most significant interaction energies.

| Residue<br>PEM-LC | TIE             |                 | Number<br>of<br>Pairs |
|-------------------|-----------------|-----------------|-----------------------|
|                   | $\epsilon_{20}$ | $\epsilon_{40}$ |                       |
| T31               | -2.93           | -2.91           | 6                     |
| Y34               | -4.68           | -4.56           | 19                    |
| Y36               | -7.41           | -7.16           | 10                    |
| Y53               | -4.18           | -4.07           | 9                     |
| L54               | -2.04           | -2.00           | 10                    |
| Y57               | 6.06            | 6.17            | 10                    |
| E59               | -11.69          | -9.69           | 4                     |
| S60               | -2.71           | -2.71           | 5                     |
| S95               | -6.99           | -6.85           | 5                     |
| R96               | -3.66           | -4.33           | 5                     |
| L98               | -3.42           | -3.29           | 8                     |

TABLE V. Calculated total interaction energy (TIE), in kcal.mol<sup>-1</sup>, and the number of the pairs evaluated through the MFCC scheme for the amino-acids of PD-1 interacting with Nivolumab heavy-chain residues that showed the most significant interaction energies.

| Residue<br>PD-1 | TIE             |                 | Number<br>of<br>Pairs |
|-----------------|-----------------|-----------------|-----------------------|
|                 | $\epsilon_{20}$ | $\epsilon_{40}$ |                       |
| D26             | -3.39           | -2.43           | 7                     |
| P28             | -23.27          | -22.78          | 25                    |
| D29             | -8.93           | -8.70           | 20                    |
| R30             | -18.03          | -16.60          | 14                    |
| P31             | -3.84           | -3.81           | 7                     |
| T59             | 5.26            | 5.28            | 5                     |
| S62             | -2.77           | -2.75           | 9                     |
| L128            | -2.87           | -2.95           | 6                     |
| A129            | -4.16           | -3.70           | 10                    |
| P130            | -9.91           | -9.60           | 11                    |
| K131            | -18.37          | -15.20          | 7                     |

TABLE VI. Calculated total interaction energy (TIE), in kcal.mol<sup>-1</sup>, and the number of the pairs evaluated through the MFCC scheme for the amino-acids of Nivolumab heavy-chain (NIV-HC) interacting with PD-1 residues that showed the most significant interaction energies.

| Residue<br>NIV-HC | TIE             |                 | Number<br>of<br>Pairs |
|-------------------|-----------------|-----------------|-----------------------|
|                   | $\epsilon_{20}$ | $\epsilon_{40}$ |                       |
| T28               | -3.39           | -3.27           | 8                     |
| N31               | -8.43           | -7.77           | 16                    |
| S32               | -4.27           | -4.24           | 10                    |
| W52               | -18.94          | -18.66          | 7                     |
| Y53               | -10.34          | -10.49          | 8                     |
| N99               | -5.41           | -5.21           | 10                    |
| D100              | -13.11          | -10.71          | 14                    |
| Y102              | -8.34           | -8.25           | 10                    |

TABLE VII. Calculated total interaction energy (TIE), in kcal.mol<sup>-1</sup>, and the number of the pairs evaluated through the MFCC scheme for the amino-acids of PD-1 interacting with Nivolumab light-chain residues that showed the most significant interaction energies.

| Residue<br>PD-1 | TIE             |                 | Number<br>of<br>Pairs |
|-----------------|-----------------|-----------------|-----------------------|
|                 | $\epsilon_{20}$ | $\epsilon_{40}$ |                       |
| D26             | -4.15           | -3.00           | 6                     |
| A129            | 9.66            | 9.84            | 7                     |
| P130            | -8.29           | -8.05           | 13                    |
| K131            | -22.12          | -21.89          | 22                    |
| A132            | -5.99           | -6.15           | 11                    |
| Q133            | -3.05           | -3.03           | 5                     |

TABLE VIII. Calculated total interaction energy (TIE), in kcal.mol<sup>-1</sup>, and the number of the pairs evaluated through the MFCC scheme for the amino-acids of Nivolumab light-chain (NIV-LC) interacting with PD-1 residues that showed the most significant interaction energies.

| Residue<br>NIV-LC | TIE             |                 | Number<br>of<br>Pairs |
|-------------------|-----------------|-----------------|-----------------------|
|                   | $\epsilon_{20}$ | $\epsilon_{40}$ |                       |
| L46               | -4.22           | -4.38           | 4                     |
| Y49               | -14.95          | -15.06          | 8                     |
| A55               | -4.87           | -4.90           | 6                     |
| T56               | 5.69            | 6.06            | 10                    |

TABLE IX. Calculated total interaction energy (TIE), in kcal.mol<sup>-1</sup>, and the number of the pairs evaluated through the MFCC scheme for the amino-acids of PD-1 interacting with PD-L1 residues that showed the most significant interaction energies.

| Residue<br>PD-1 | TIE             |                 | Number<br>of<br>Pairs |
|-----------------|-----------------|-----------------|-----------------------|
|                 | $\epsilon_{20}$ | $\epsilon_{40}$ |                       |
| N66             | -5.17           | -3.08           | 12                    |
| Y68             | -11.72          | -11.63          | 12                    |
| N74             | -2.96           | -2.38           | 8                     |
| Q75             | -17.20          | -16.54          | 19                    |
| T76             | -11.43          | -11.17          | 14                    |
| D77             | -3.43           | -2.88           | 9                     |
| K78             | -5.62           | -11.18          | 17                    |
| E84             | -5.79           | -5.52           | 8                     |
| I126            | -7.11           | -7.07           | 16                    |
| L128            | -5.50           | -4.31           | 20                    |
| K131            | -18.24          | -14.70          | 20                    |
| Q133            | -2.35           | -2.15           | 11                    |
| I134            | -10.87          | -10.41          | 19                    |
| E136            | -13.10          | -10.26          | 6                     |

TABLE X. Calculated total interaction energy (TIE), in kcal.mol<sup>-1</sup>, and the number of the pairs evaluated through the MFCC scheme for the amino-acids of PD-L1 interacting with PD-1 residues that showed the most significant interaction energies.

| Residue<br>PD-L1 | TIE             |                 | Number<br>of<br>Pairs |
|------------------|-----------------|-----------------|-----------------------|
|                  | $\epsilon_{20}$ | $\epsilon_{40}$ |                       |
| ALA18            | -3.80           | -3.70           | 7                     |
| PHE19            | -8.99           | -8.62           | 11                    |
| THR20            | -6.63           | -6.55           | 10                    |
| ASP26            | -3.64           | -3.37           | 6                     |
| ILE54            | -2.88           | -2.89           | 10                    |
| TYR56            | -6.63           | -6.02           | 9                     |
| GLU58            | -3.61           | -2.47           | 7                     |
| GLN66            | -2.53           | -2.30           | 8                     |
| VAL76            | -2.85           | -2.76           | 5                     |
| ARG113           | -10.88          | -9.62           | 15                    |
| MET115           | -5.99           | -6.08           | 17                    |
| GLY120           | -1.99           | -2.09           | 8                     |
| ALA121           | -8.67           | -8.27           | 20                    |
| ASP122           | -1.11           | -2.50           | 17                    |
| TYR123           | -17.42          | -17.13          | 26                    |
| LYS124           | -13.95          | -13.16          | 16                    |
| ARG125           | -15.22          | -13.10          | 15                    |
